# Supplementary material
Source: PubMed Central journal article supplement (PMC6089250)
Supplement: NIHMS983392-supplement-Supplemental.pdf [file NIHMS983392-supplement-Supplemental.pdf]

**Supplementary Table 1** Clinical and pathological features of controls and ET grouped by age of tremor onset 40 years

| Variables                                               | Controls                    | ET Cases                            |                                     | <i>p</i> value<br>(all three<br>groups) | <i>p</i> value                 |                                |                                     |
|---------------------------------------------------------|-----------------------------|-------------------------------------|-------------------------------------|-----------------------------------------|--------------------------------|--------------------------------|-------------------------------------|
|                                                         |                             | Age of tremor<br>onset <40<br>years | Age of tremor<br>onset ≥40<br>years |                                         | Control vs.<br>ET <40<br>years | Control vs.<br>ET ≥40<br>years | ET <40<br>years vs. ET<br>≥40 years |
| n                                                       | 30                          | 24                                  | 36                                  |                                         |                                |                                |                                     |
| Age at death (years)                                    | 84.2 ± 8.6                  | 86.2 ± 6.3                          | 86.8 ± 4.8                          | 0.283 <sup>a</sup>                      | 0.540 <sup>b</sup>             | 0.266 <sup>b</sup>             | 0.929 <sup>b</sup>                  |
| Age of tremor onset (years)                             | NA                          | 18.9 ± 8.6                          | 58.4 ± 9.8                          |                                         |                                |                                | <b>&lt;0.001<sup>c</sup></b>        |
| Duration of tremor (years)                              | NA                          | 67.5 ± 9.6                          | 28.4 ± 11.0                         |                                         |                                |                                | <b>&lt;0.001<sup>c</sup></b>        |
| Gender                                                  |                             |                                     |                                     | 0.569 <sup>d</sup>                      | 0.358 <sup>d</sup>             | 0.365 <sup>d</sup>             | 0.914 <sup>d</sup>                  |
| Male                                                    | 15 (50.0%)                  | 9 (37.5%)                           | 14 (38.9%)                          |                                         |                                |                                |                                     |
| Female                                                  | 15 (50.0%)                  | 15 (62.5%)                          | 22 (61.1%)                          |                                         |                                |                                |                                     |
| PC counts                                               | 10.6 ± 1.9                  | 9.2 ± 1.3                           | 8.7 ± 1.4                           | <b>0.008<sup>a</sup></b>                | 0.060 <sup>b</sup>             | <b>0.005<sup>b</sup></b>       | 0.566 <sup>b</sup>                  |
| Torpedo counts                                          | 5.4 ± 4.0<br>Median = 4.0   | 25.8 ± 26.4<br>Median = 15.0        | 28.7 ± 29.6<br>Median = 17.0        | <b>0.006<sup>e</sup></b>                | <b>0.004<sup>f</sup></b>       | <b>0.002<sup>f</sup></b>       | 0.783 <sup>f</sup>                  |
| CF synaptic density<br>(puncta/100μm)                   | 21.9 ± 3.6<br>Median = 22.5 | 18.46 ± 2.83<br>Median = 18.0       | 17.6 ± 1.8<br>Median = 17.5         | <b>&lt;0.001<sup>e</sup></b>            | <b>&lt;0.001<sup>f</sup></b>   | <b>&lt;0.001<sup>f</sup></b>   | 0.344 <sup>f</sup>                  |
| Percentage of CFs<br>extending into the PF<br>territory | 20.2 ± 9.2                  | 27.3 ± 6.9                          | 30.0 ± 6.6                          | <b>&lt;0.001<sup>a</sup></b>            | <b>0.003<sup>b</sup></b>       | <b>&lt;0.001<sup>b</sup></b>   | 0.355 <sup>b</sup>                  |

Values represent mean ± standard deviation or number (percentage), and for variables with a non-normal distribution, the median is reported as well. Mean number of PC counts per 100x microscopic field, among 15 sampled fields. Bolded values are significant (with Bonferroni correction).

NA not applicable

<sup>a</sup>One-way analysis of variance (ANOVA)

<sup>b</sup>Post hoc multiple comparisons (Tukey HSD) in one-way analysis of variance (ANOVA)

<sup>c</sup>Independent samples *t* test

<sup>d</sup>Chi-square test

<sup>e</sup>Independent samples Kruskal-Wallis H test

<sup>f</sup>Independent samples Mann-Whitney U test

Abbreviations: PC: Purkinje cells, CF: climbing fiber, PF: parallel fiber.

**Supplementary Table 2** Clinical and pathological features of controls and ET grouped by age of tremor onset 60 years

| Variables                                               | Controls                    | ET Cases                            |                                     | <i>p</i> value<br>(all three<br>groups) | <i>p</i> value                 |                                |                                     |
|---------------------------------------------------------|-----------------------------|-------------------------------------|-------------------------------------|-----------------------------------------|--------------------------------|--------------------------------|-------------------------------------|
|                                                         |                             | Age of tremor<br>onset <60<br>years | Age of tremor<br>onset ≥60<br>years |                                         | Control vs.<br>ET <40<br>years | Control vs.<br>ET ≥40<br>years | ET <40<br>years vs. ET<br>≥40 years |
| <i>n</i>                                                | 30                          | 41                                  | 19                                  |                                         |                                |                                |                                     |
| Age at death (years)                                    | 84.2 ± 8.6                  | 86.2 ± 5.8                          | 87.4 ± 4.4                          | 0.238 <sup>a</sup>                      | 0.456 <sup>b</sup>             | 0.235 <sup>b</sup>             | 0.768 <sup>b</sup>                  |
| Age of tremor onset (years)                             | NA                          | 31.9 ± 17.4<br>Median = 28.0        | 65.7 ± 6.0<br>Median = 64.5         |                                         |                                |                                | <b>&lt;0.001<sup>c</sup></b>        |
| Duration of tremor (years)                              | NA                          | 54.4 ± 18.4                         | 21.7 ± 7.2                          |                                         |                                |                                | <b>&lt;0.001<sup>d</sup></b>        |
| Gender                                                  |                             |                                     |                                     | 0.441 <sup>e</sup>                      | 0.475 <sup>e</sup>             | 0.204 <sup>e</sup>             | 0.464 <sup>e</sup>                  |
| Male                                                    | 15 (50.0%)                  | 17 (41.5%)                          | 6 (46.2%)                           |                                         |                                |                                |                                     |
| Female                                                  | 15 (50.0%)                  | 24 (58.5%)                          | 13 (53.8%)                          |                                         |                                |                                |                                     |
| PC counts                                               | 10.6 ± 1.9                  | 9.3 ± 1.3                           | 8.3 ± 1.3                           | <b>0.001<sup>a</sup></b>                | <b>0.039<sup>b</sup></b>       | <b>0.001<sup>b</sup></b>       | 0.091 <sup>b</sup>                  |
| Torpedo counts                                          | 5.4 ± 4.0<br>Median = 4.0   | 28.4 ± 30.2<br>Median = 17.0        | 24.9 ± 22.6<br>Median = 16.5        | <b>0.006<sup>f</sup></b>                | <b>0.001<sup>c</sup></b>       | <b>0.012<sup>c</sup></b>       | 0.810 <sup>c</sup>                  |
| CF synaptic density<br>(puncta/100μm)                   | 21.9 ± 3.6<br>Median = 22.5 | 18.5 ± 2.4<br>Median = 18.0         | 16.7 ± 1.5<br>Median = 17.0         | <b>&lt;0.001<sup>f</sup></b>            | <b>&lt;0.001<sup>c</sup></b>   | <b>&lt;0.001<sup>c</sup></b>   | <b>0.005<sup>c</sup></b>            |
| Percentage of CFs<br>extending into the PF<br>territory | 20.2 ± 9.2                  | 28.3 ± 6.8                          | 30.2 ± 6.8                          | <b>&lt;0.001<sup>a</sup></b>            | <b>&lt;0.001<sup>b</sup></b>   | <b>&lt;0.001<sup>b</sup></b>   | 0.649 <sup>b</sup>                  |

Values represent mean ± standard deviation or number (percentage), and for variables with a non-normal distribution, the median is reported as well. Mean number of PC counts per 100x microscopic field, among 15 sampled fields. Bolded values are significant (with Bonferroni correction).

NA not applicable

<sup>a</sup>One-way analysis of variance (ANOVA)

<sup>b</sup>Post hoc multiple comparisons (Tukey HSD) in one-way analysis of variance (ANOVA)

<sup>c</sup>Independent samples Mann-Whitney U test

<sup>d</sup>Independent samples *t* test

<sup>e</sup>Chi-square test

<sup>f</sup>Independent samples Kruskal-Wallis H test

Abbreviations: PC: Purkinje cells, CF: climbing fiber, PF: parallel fiber.

**Supplementary Table 3** Clinical and pathological features of controls and essential tremor grouped by childhood ( $\leq 18$  years) vs. adult ( $> 18$  years) onset

| Variables                                       | Controls                        | ET Cases                            |                                           | <i>p</i> value<br>(all three<br>groups) | <i>p</i> value                 |                                      |                                           |
|-------------------------------------------------|---------------------------------|-------------------------------------|-------------------------------------------|-----------------------------------------|--------------------------------|--------------------------------------|-------------------------------------------|
|                                                 |                                 | Age of tremor<br>onset <20<br>years | Age of tremor<br>onset $\geq 20$<br>years |                                         | Control vs.<br>ET <20<br>years | Control vs.<br>ET $\geq 20$<br>years | ET <20<br>years vs. ET<br>$\geq 20$ years |
| n                                               | 30                              | 13                                  | 47                                        |                                         |                                |                                      |                                           |
| Age at death (years)                            | 84.2 $\pm$ 8.6                  | 86.0 $\pm$ 7.0                      | 86.7 $\pm$ 5.0                            | 0.285 <sup>a</sup>                      | 0.704 <sup>b</sup>             | 0.256 <sup>b</sup>                   | 0.939 <sup>b</sup>                        |
| Age of tremor onset (years)                     | NA                              | 12.5 $\pm$ 3.7<br>Median = 13.0     | 50.9 $\pm$ 16.4<br>Median = 55.0          |                                         |                                |                                      | <b>&lt;0.001<sup>c</sup></b>              |
| Duration of tremor (years)                      | NA                              | 73.0 $\pm$ 8.5<br>Median = 74.0     | 36.0 $\pm$ 17.2<br>Median = 32.0          |                                         |                                |                                      | <b>&lt;0.001<sup>c</sup></b>              |
| Gender                                          |                                 |                                     |                                           | 0.471 <sup>d</sup>                      | 0.244 <sup>d</sup>             | 0.409 <sup>d</sup>                   | 0.526 <sup>d</sup>                        |
| Male                                            | 15 (50.0%)                      | 4 (30.8%)                           | 19 (40.4%)                                |                                         |                                |                                      |                                           |
| Female                                          | 15 (50.0%)                      | 9 (69.2%)                           | 28 (59.6%)                                |                                         |                                |                                      |                                           |
| PC counts                                       | 10.6 $\pm$ 1.9                  | 9.1 $\pm$ 1.2                       | 8.9 $\pm$ 1.4                             | <b>0.011<sup>a</sup></b>                | 0.094 <sup>b</sup>             | <b>0.008<sup>b</sup></b>             | 0.888 <sup>b</sup>                        |
| Torpedo counts                                  | 5.4 $\pm$ 4.0<br>Median = 4.0   | 26.7 $\pm$ 27.9<br>Median = 21.0    | 27.6 $\pm$ 28.4<br>Median = 16.5          | <b>0.006<sup>e</sup></b>                | <b>0.004<sup>c</sup></b>       | <b>0.002<sup>c</sup></b>             | 0.816 <sup>c</sup>                        |
| CF synaptic density<br>(puncta/100 $\mu$ m)     | 21.9 $\pm$ 3.6<br>Median = 22.5 | 18.6 $\pm$ 3.0<br>Median = 18.0     | 17.8 $\pm$ 2.1<br>Median = 18.0           | <b>&lt;0.001<sup>e</sup></b>            | <b>0.005<sup>c</sup></b>       | <b>&lt;0.001<sup>c</sup></b>         | 0.399 <sup>c</sup>                        |
| Percentage of CF extending<br>into PF territory | 20.2 $\pm$ 9.2                  | 27.4 $\pm$ 4.4                      | 29.3 $\pm$ 7.3                            | <b>&lt;0.001<sup>a</sup></b>            | 0.016 <sup>b</sup>             | <b>&lt;0.001<sup>b</sup></b>         | 0.696 <sup>b</sup>                        |

Values represent mean  $\pm$  standard deviation or number (percentage), and for variables with a non-normal distribution, the median is reported as well. Mean number of PC counts per 100 $\times$  microscopic field, among 15 sampled fields. Bolded values are significant (with Bonferroni Correction).

<sup>a</sup>One-way analysis of variance (ANOVA)

<sup>b</sup>Post hoc multiple comparisons (Tukey HSD) in one-way analysis of variance (ANOVA)

<sup>c</sup>Independent samples Mann-Whitney U test

<sup>d</sup>Chi-square test

<sup>e</sup>Independent samples Kruskal-Wallis H test

Abbreviations: PC: Purkinje cells, CF: climbing fiber, PF: parallel fiber.

**Supplementary Table 4** Clinical and pathological features of ET grouped by head tremor

| Variables                                          | Controls                    | ET Cases                     |                              | <i>p</i> value<br>(all three<br>groups) | <i>p</i> value                |                                  |                                      |
|----------------------------------------------------|-----------------------------|------------------------------|------------------------------|-----------------------------------------|-------------------------------|----------------------------------|--------------------------------------|
|                                                    |                             | Head tremor                  | No head<br>tremor            |                                         | Control vs.<br>head<br>tremor | Control vs.<br>no head<br>tremor | Head tremor<br>vs. no head<br>tremor |
| n                                                  | 30                          | 36                           | 24                           |                                         |                               |                                  |                                      |
| Age at death (years)                               | 84.2 ± 8.5<br>Median = 84.0 | 85.6 ± 5.8<br>Median = 86.5  | 87.9 ± 4.6<br>Median = 89.0  | 0.068 <sup>a</sup>                      | 0.363 <sup>b</sup>            | 0.036 <sup>b</sup>               | 0.071 <sup>b</sup>                   |
| Age of tremor onset<br>(years)                     |                             | 38.8 ± 23.3<br>Median = 41.0 | 48.3 ± 17.8<br>Median = 54.0 |                                         |                               |                                  | 0.149 <sup>b</sup>                   |
| Duration of tremor<br>(years)                      |                             | 46.6 ± 23.9                  | 40.1 ± 18.3                  |                                         |                               |                                  | 0.260 <sup>c</sup>                   |
| Gender                                             |                             |                              |                              | 0.073 <sup>d</sup>                      | 0.064 <sup>d</sup>            | 0.761 <sup>d</sup>               | 0.039 <sup>d</sup>                   |
| Male                                               | 15 (50.0%)                  | 10 (27.8%)                   | 13 (54.2%)                   |                                         |                               |                                  |                                      |
| Female                                             | 15 (50.0%)                  | 26 (72.2%)                   | 11 (45.8%)                   |                                         |                               |                                  |                                      |
| Purkinje cell counts                               | 10.6 ± 1.9                  | 8.9 ± 1.2                    | 9.1 ± 1.7                    | <b>0.011<sup>e</sup></b>                | <b>0.008<sup>f</sup></b>      | 0.058 <sup>f</sup>               | 0.853 <sup>f</sup>                   |
| Torpedo counts                                     | 5.4 ± 4.0<br>Median = 4.0   | 26.2 ± 27.3<br>Median = 16.0 | 30.2 ± 30.4<br>Median = 19.0 | <b>0.005<sup>a</sup></b>                | <b>0.003<sup>b</sup></b>      | <b>0.001<sup>b</sup></b>         | 0.506 <sup>b</sup>                   |
| CF synaptic density<br>(puncta/100 um)             | 21.9 ± 3.6<br>Median = 22.5 | 18.5 ± 2.4<br>Median = 18.0  | 17.2 ± 1.8<br>Median = 17.0  | <b>&lt;0.001<sup>a</sup></b>            | <b>&lt;0.001<sup>b</sup></b>  | <b>&lt;0.001<sup>b</sup></b>     | 0.031 <sup>b</sup>                   |
| Percentage of CF<br>extending into outer<br>20% ML | 20.2 ± 9.2                  | 27.5 ± 6.5                   | 31.1 ± 6.9                   | <b>&lt;0.001<sup>e</sup></b>            | <b>0.001<sup>f</sup></b>      | <b>&lt;0.001<sup>f</sup></b>     | 0.172 <sup>f</sup>                   |

Values represent mean ± standard deviation or number (percentage), and for variables with a non-normal distribution, the median is reported as well. Mean number of PC counts per 100× microscopic field, among 15 sampled fields. 48 ET cases had head tremor assessed using a video examination, and the other 12 had head tremor assessed using clinical information. Bolded values are significant (with Bonferroni correction).

<sup>a</sup>Independent samples Kruskal-Wallis H test

<sup>b</sup>Independent samples Mann-Whitney U test

<sup>c</sup>Independent sample *t* test

<sup>d</sup>Chi-square test

<sup>e</sup>One-way analysis of variance (ANOVA)

<sup>f</sup>Post hoc multiple comparisons (Tukey HSD) in one-way analysis of variance (ANOVA)

Abbreviations: PC: Purkinje cells, CF: climbing fiber, PF: parallel fiber.

**Supplementary Table 5** Correlations of clinical and pathological characteristics with climbing fiber pathology

|                                       | CF synaptic density |                  | Percentage of CFs in PF Territory |                  |
|---------------------------------------|---------------------|------------------|-----------------------------------|------------------|
|                                       | r <sup>a</sup>      | p value          | r <sup>a</sup>                    | p value          |
| Duration of tremor                    | 0.183               | 0.161            | -0.207                            | 0.112            |
| Tremor Severity (TTS)                 | 0.084               | 0.566            | -0.037                            | 0.802            |
| PC count                              | 0.389               | <b>0.005</b>     | -0.345                            | <b>0.014</b>     |
| Torpedo counts                        | -0.304              | <b>0.032</b>     | 0.374                             | <b>0.007</b>     |
| CF synaptic density                   |                     |                  | -0.39                             | <b>&lt;0.001</b> |
| Percentage of CFs in the PF Territory | -0.39               | <b>&lt;0.001</b> |                                   |                  |

Bolded values are significant

<sup>a</sup>Spearman's correlation coefficient

Abbreviations: PC: Purkinje cells, CF: climbing fiber, PF: parallel fiber, TTS: total tremor score.
